# Supplementary material for: Arabidopsis heterotrimeric G protein β subunit, AGB1, regulates brassinosteroid signalling independently of BZR1
Source: PubMed Central journal article supplement — J Exp Bot. 2013 Jun 27;64(11):3213–23. doi: 10.1093/jxb/ert159 (PMC3733146; doi:10.1093/jxb/ert159), 2013-06-27
Supplement: supp_ert159_jexbot093732_file001.pdf [file supp_ert159_jexbot093732_file001.pdf]

## Supplementary material

### Arabidopsis heterotrimeric G protein $\beta$ subunit, AGB1, regulates brassinosteroid signaling independently of BZR1

Daisuke Tsugama, Shenkui Liu, Tetsuo Takano

## Supplementary figures

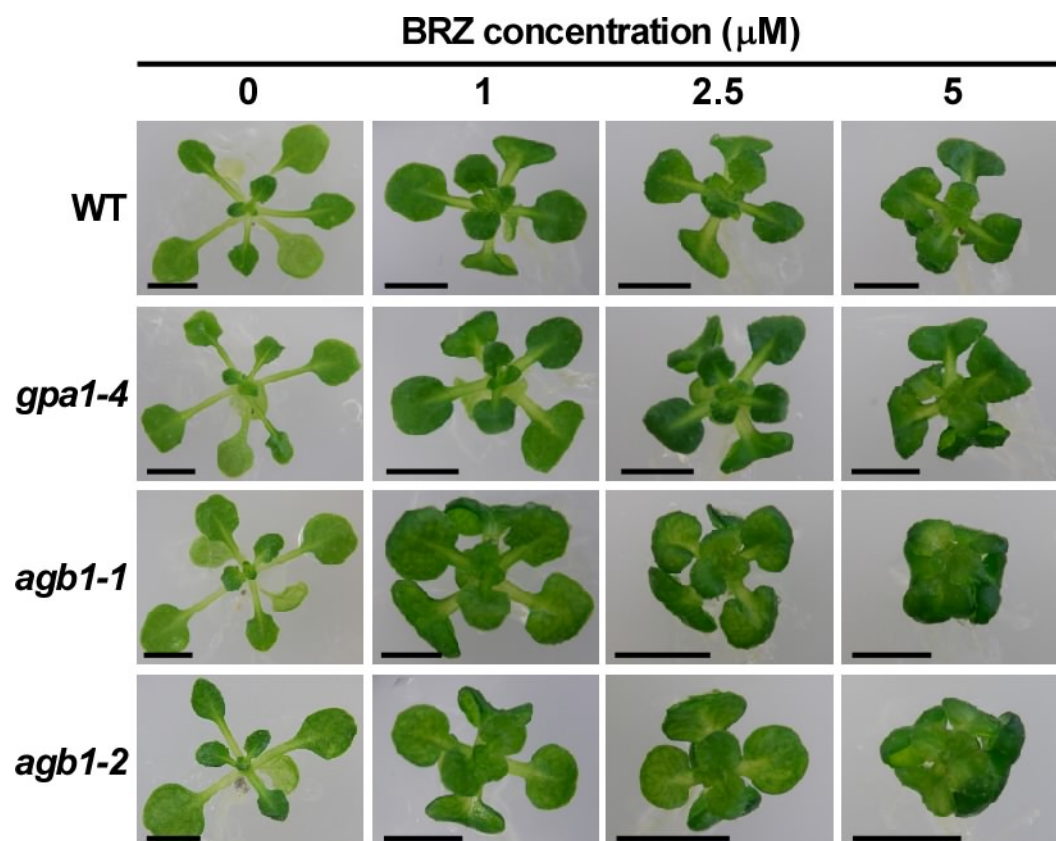

**Supplementary Fig. S1.** Phenotypes of *agb1* grown in different concentrations of BRZ.

Plants were grown for 20 days in the presence of the indicated concentrations of BRZ.

Scale bars = 1 cm.

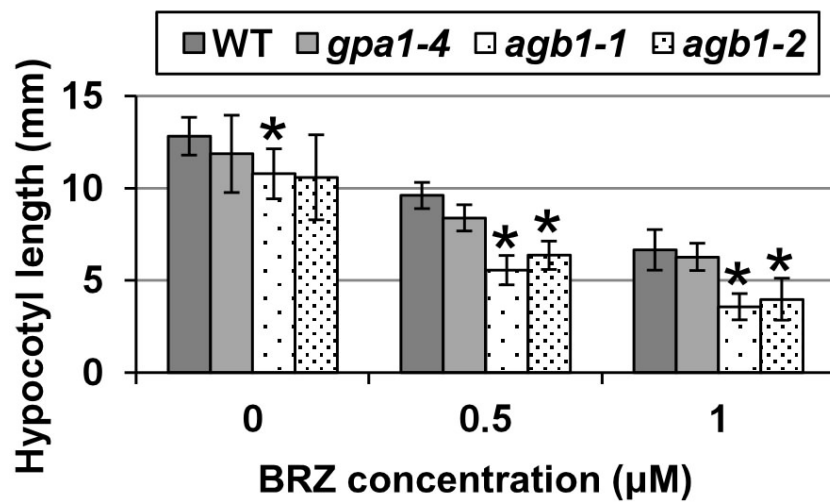

**Supplementary Fig. S2.** Absolute hypocotyl lengths of plants grown in the presence of BRZ. Hypocotyl lengths for calculating relative hypocotyl lengths in Fig. 1B are shown. Values are means  $\pm$  SE (n = 11-18). \*:  $P < 0.05$  vs. the WT by Student's *t*-test.

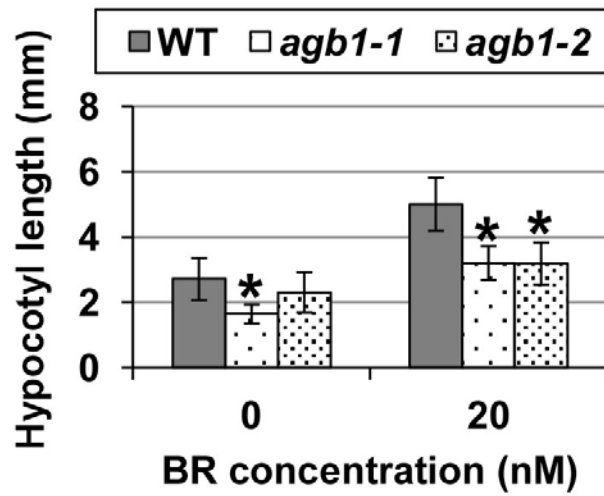

**Supplementary Fig. S3.** BR-induced hypocotyl elongations in *agb1*. Plants were grown under a 16-h light/8-h dark photoperiod for 15 days in the presence of 0 or 20 nM BR, and their hypocotyl lengths were measured. Values are means  $\pm$  SE (n = 20-24). \*: P < 0.05 vs. WT by Student's *t*-test.

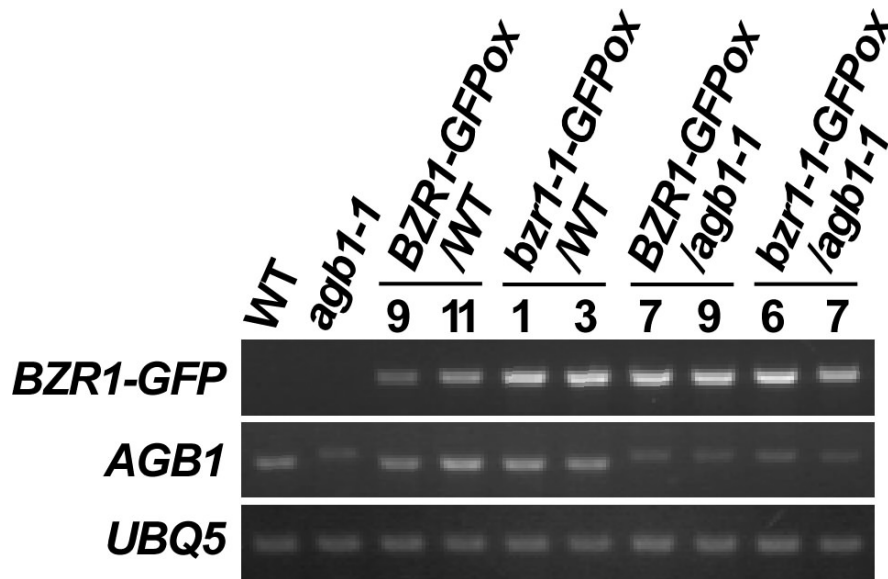

**Supplementary Fig. S4.** Semi-quantitative RT-PCR analysis of *BZR1-GFP* and *bzr1-1-GFP* expressions. Plants were grown for 20 days and sampled for RNA preparation. Transgenic lines used for the analysis are shown as numbers. The same primer pair was used to detect both *BZR1-GFP* expression and *bzr1-1-GFP* expression, thus the expressions of *BZR1-GFP* and *bzr1-1-GFP* are both shown as *BZR1-GFP*. *AGB1* transcripts were larger in size and lower in level in *agb1-1*-background lines than in WT-background lines, which is consistent with a previous report (Lease *et al.*, 2001).

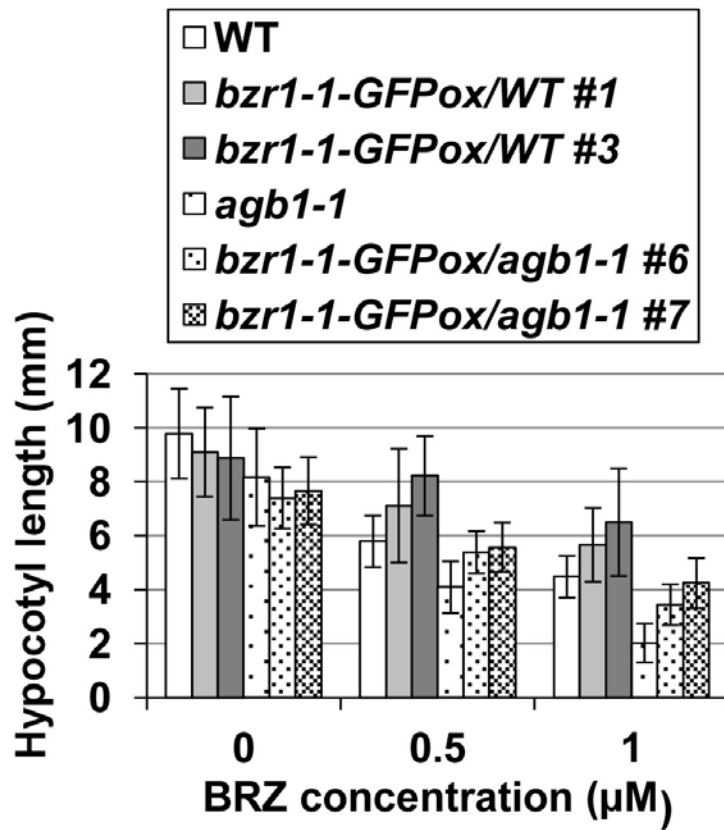

**Supplementary Fig. S5.** Absolute hypocotyl lengths of plants grown in the presence of BRZ. Hypocotyl lengths for calculating relative hypocotyl lengths in Fig. 2A are shown. Values are means  $\pm$  SE (n = 15-24). \*: P < 0.05 vs. the WT by Student's *t*-test.

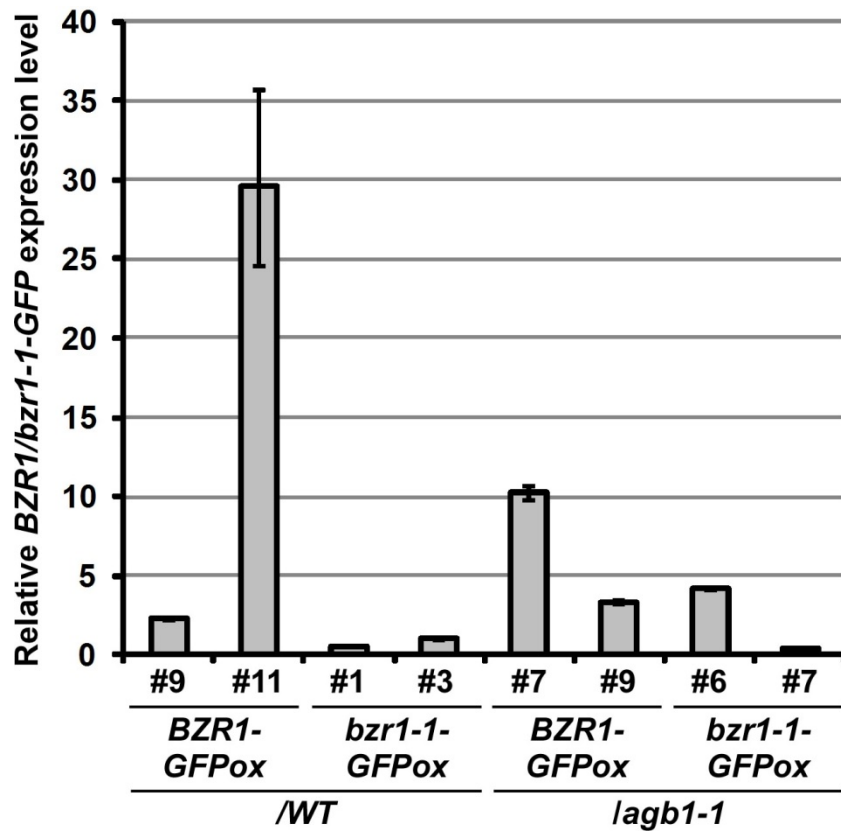

**Supplementary Fig. S6.** Expression levels of *BZR1-GFP* and *bzr1-1-GFP* (*BZR1/bzr1-1-GFP*) in transgenic plants. Relative expression levels of were calculated by the comparative  $C_T$  method using *UBQ5* as an internal control gene and *bzr1-1-GFPox/WT* #3 sample as a reference sample. Experiments were performed in triplicate. Values are means  $\pm$  SE.

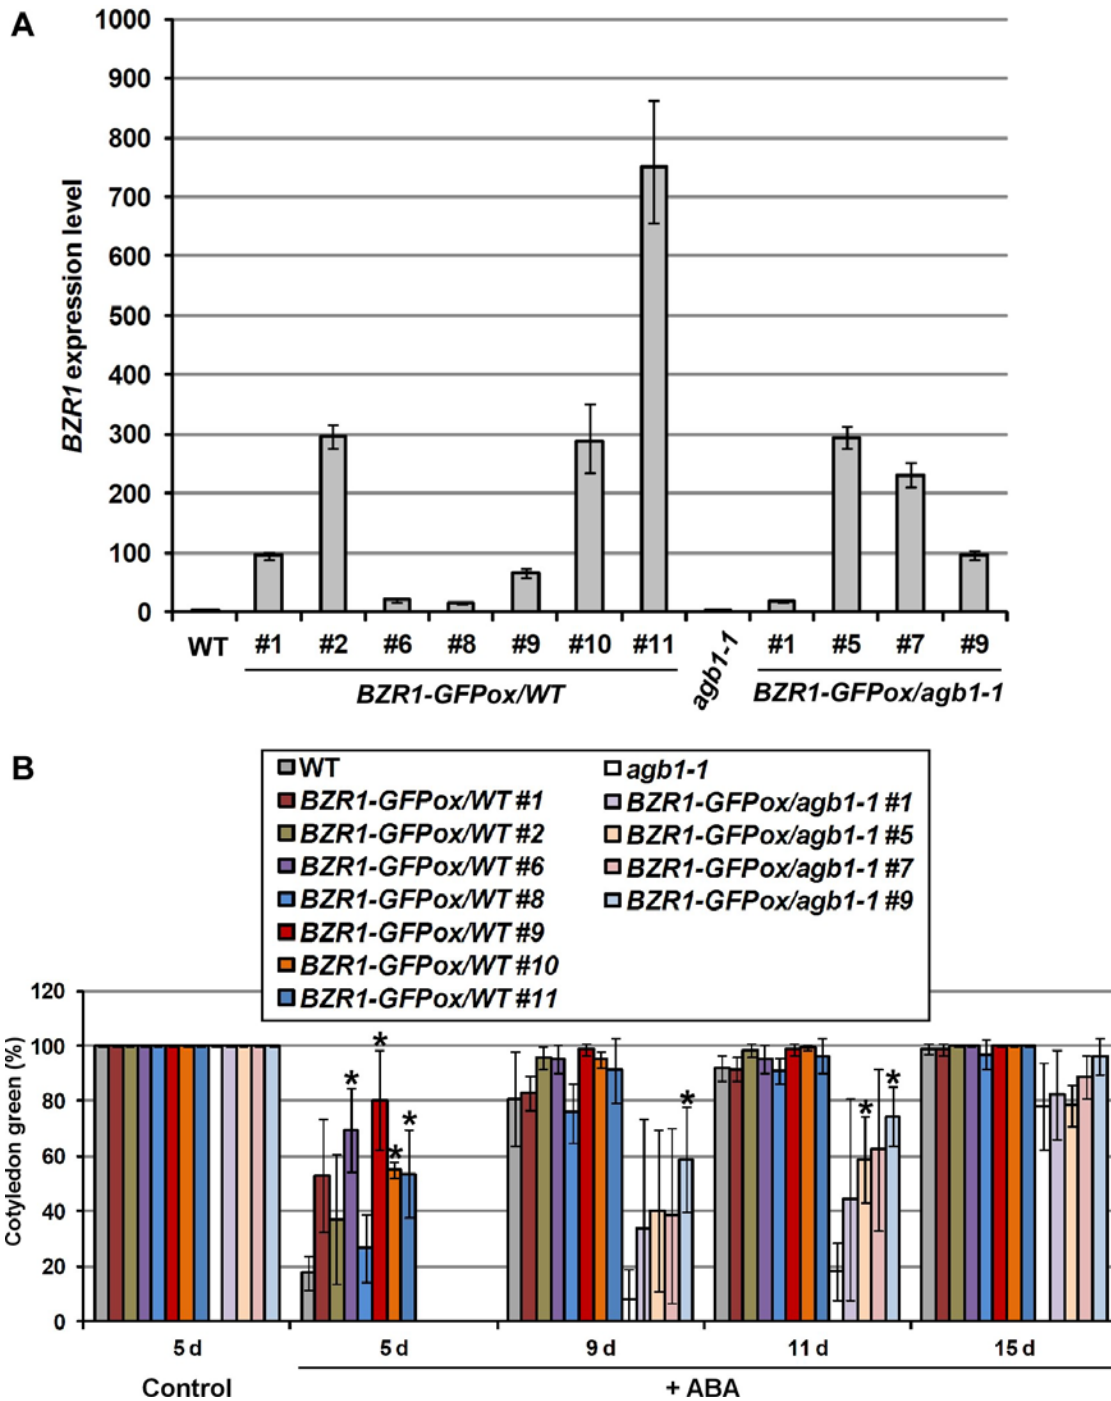

**Supplementary Fig. S7.** *BZR1* expression levels in *BZR1-GFP*-overexpressing lines and their responses to ABA. (A) Quantitative RT-PCR analysis of *BZR1* expression levels in *BZR1*-overexpressing lines. Relative *BZR1* expression levels were calculated by the comparative  $C_T$  method using *UBQ5* as an internal control gene and WT sample

as a reference sample. Experiments were performed in triplicate. Values are means  $\pm$  SE.

(B) Plants were grown in the presence of 0 (Control) or 1  $\mu$ M ABA (+ ABA). Green cotyledons were scored at the indicated time points. More than 30 plants were used for scoring green cotyledons in each genotype. Experiments were performed in triplicate.

Values are means  $\pm$  SE. \*:  $P < 0.05$  vs. non-transgenic lines by Student's *t*-test.



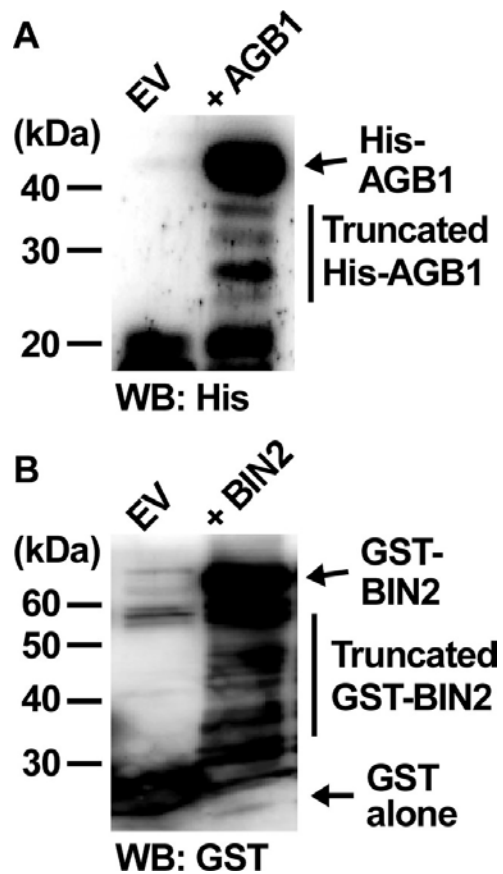

**Supplementary Fig. S8.** Expressions of His-AGB1 and GST-BIN2 in *E. coli*. (A) Crude extracts of *E. coli* transformed with empty vector (EV) or a construct to express hexahistidine-tagged AGB1 (+ AGB1) were subjected to Western blotting using a polyhistidine probe, HisProbe-HRP (WB: His). (B) Crude extracts of *E. coli* transformed with empty vector (EV) or a construct to express GST-fused BIN2 (+ BIN2) were subjected to Western blotting using an anti-GST antibody (WB: GST).

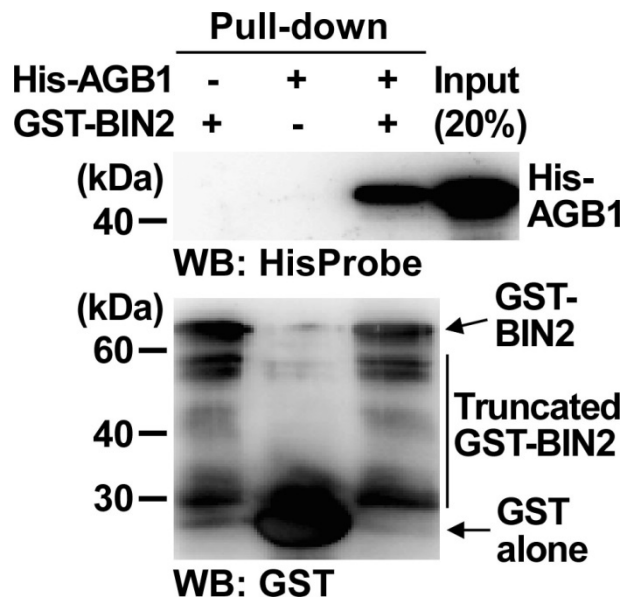

**Supplementary Fig. S9.** In vitro GST pull-down assay. Hexahistidine-tagged AGB1 (His-AGB1) and GST-fused BIN2 (GST-BIN2) were expressed in *E. coli* and used for the analysis. For His-AGB1-, 250 mM imidazole was used instead of a solution containing purified His-AGB1. For GST-BIN2-, GST alone was use instead of GST-BIN2. His-AGB1 was analyzed by Western blotting using a polyhistidine probe, HisProbe-HRP (WB: HisProbe). Input His-AGB1 (20% of the amount used for the pull-down assay) is shown as Input (20%) for control. GST-BIN2 in the same protein samples was analyzed by Western blotting using an anti-GST antibody (WB: GST) for control. Some truncated forms of GST-BIN2 were detected, probably due to protein degradation and/or unexpected translational termination. Experiments were performed in triplicate, and a representative result is shown.

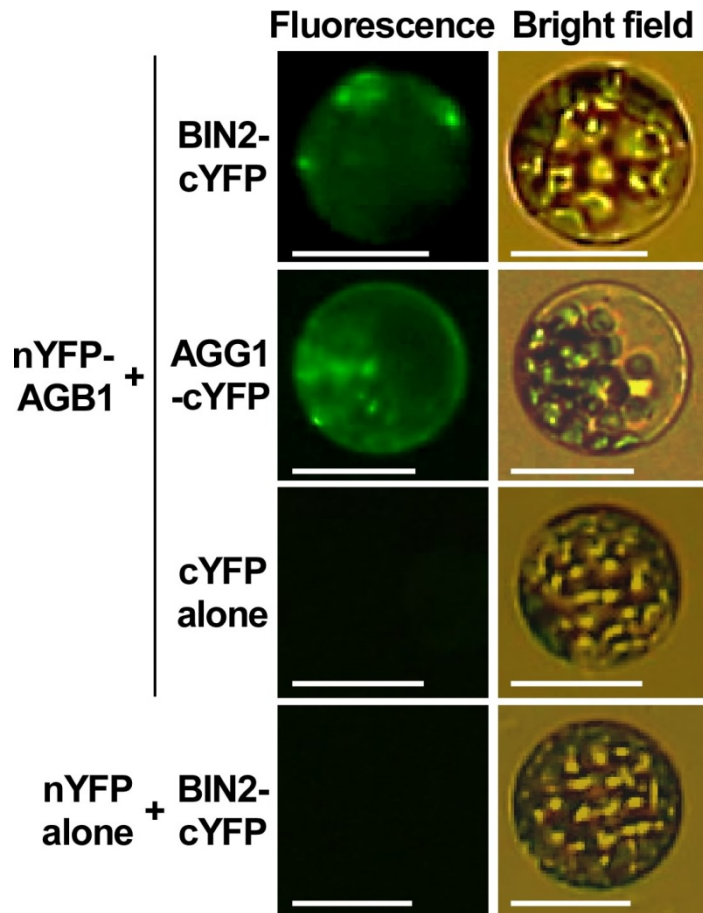

**Supplementary Fig. S10.** Bimolecular fluorescence complementation between AGB1 and BIN2. The ORF of *AGB1* was cloned in frame behind the coding sequence of the N-terminal region of YFP (nYFP) to express nYFP-fused AGB1 (nYFP-AGB1), and the ORFs of *AGG1* and *BIN2* were cloned in frame in front of the coding sequence of the C-terminal region of YFP (cYFP) to express cYFP-fused AGG1 and cYFP-fused BIN2 (AGG1-cYFP and BIN2-cYFP, respectively). The proteins were co-expressed in the indicated combinations in *Arabidopsis* mesophyll protoplasts. More than 20 cells were observed and a representative cell is shown for each combination. Scale bars = 20  $\mu$ m.

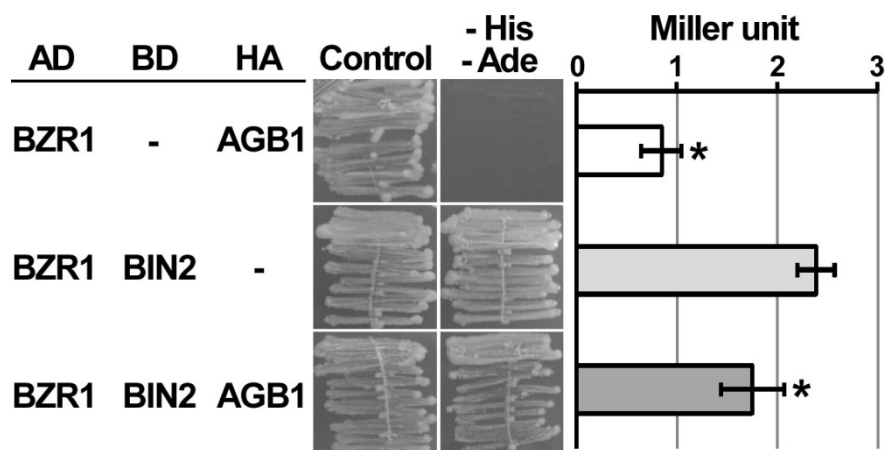

**Supplementary Fig. S11.** Effects of AGB1 on the interaction between BIN2 and BZR1 in a yeast three-hybrid system. The yeast reporter strain, AH109, was transformed with pGADT7-Rec containing *BZR1* to express GAL4 activation domain (AD)-fused BZR1, and pBridge containing either or both of *BIN2* and *AGB1* to express GAL4 DNA-binding domain (BD)-fused BIN2 and HA-tagged AGB1, respectively. The combinations of the expressed proteins are shown in the left table. Transformed cells were grown on SD medium (Control) and SD medium lacking histidine and adenine (-His - Ade) (middle panels). For each transformed cell line, four individual colonies that had appeared after transformation were tested, and representative results are shown. The activities of  $\beta$ -galactosidase in the transformed lines were quantified and shown as Miller units (right panel). For each transformed cell line, 4-8 individual colonies were used for the  $\beta$ -galactosidase assay. Values are means  $\pm$  SE. \*:  $P < 0.05$  vs. the cell line expressing BZR1, BIN2, and AGB1 by Student's *t*-test.

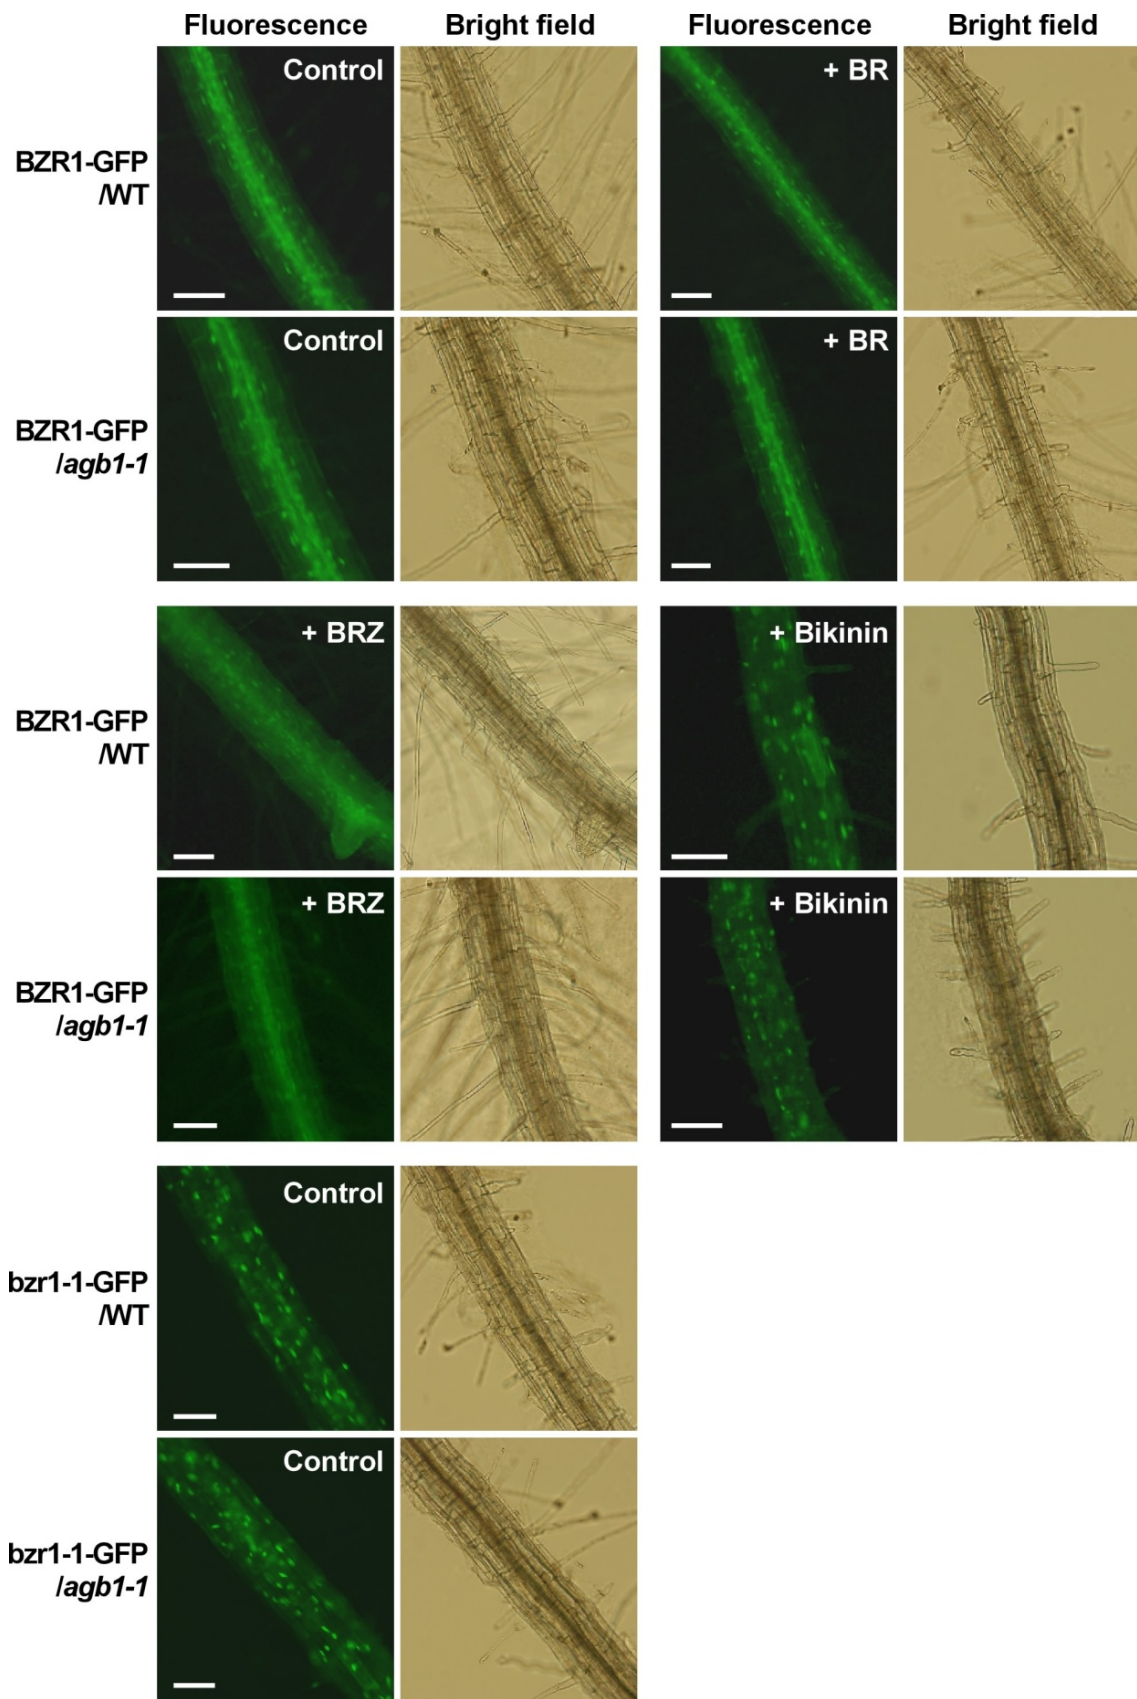

**Supplementary Fig. S12.** Subcellular localizations of BZR1-GFP and *bzr1-1*-GFP in *agb1*. *BZR1-GFPox/WT* #9 and *BZR1-GFPox/agb1-1* #9 were grown under a 16-h light/8-h dark photoperiod for 15 days in the presence of 20 nM BR (+ BR), 2.5  $\mu$ M BRZ (+ BRZ), or 40  $\mu$ M bikinin (+ Bikinin), or in the absence of BR, BRZ, or bikinin (Control). *bzr1-1-GFPox/WT* #1 and *bzr1-1-GFPox/agb1-1* #6 were grown under a 16-h light/8-h dark photoperiod for 15 days under normal growth conditions (Control). GFP fluorescence in a root is shown in each panel. Scale bars = 100  $\mu$ m.

**Supplementary Table S1. Primer pairs used for RT-PCR analyses**

| Gene            |    | Primer sequence (5' > 3')     |
|-----------------|----|-------------------------------|
| <i>BZR1-GFP</i> | Fw | TCGCCACCAGTTTCATACCC          |
|                 | Rv | GTAGGTGGCATCGCCCTCGC          |
| <i>BZR1</i>     | Fw | TCGCCACCAGTTTCATACCC          |
|                 | Rv | TCCTCTAGAACCACGAGCCTTCCCATTCC |
| <i>AGB1</i>     | Fw | AGACGCCTCCAGCTCCTCGA          |
|                 | Rv | GCACTTCCATCTGCTGACAACCCC      |
| <i>RAB18</i>    | Fw | TCCAGCTCTAGCTCGGAGGATGA       |
|                 | Rv | GGATCCCATGCCGCCCATCG          |
| <i>RD29A</i>    | Fw | GCCGGAATCTGACGGCGGTT          |
|                 | Rv | CCCGTCGGCACATCCTTGTCG         |
| <i>CPD</i>      | Fw | GGCCAAGGCTATGTCCCGG           |
|                 | Rv | ACGGCGCTTCACGAAGATCGG         |
| <i>DWF4</i>     | Fw | ACCGGTGATCTCAGCCGTACA         |
|                 | Rv | TTGGCCCTCCTCCAAACGGC          |
| <i>UBQ5</i>     | Fw | GACGCTTCATCTCGTCC             |
|                 | Rv | CCACAGGTTGCGTTAG              |
